# Supplementary material
Source: PubMed Central journal article supplement (PMC7065961)
Supplement: NIHMS1548185-supplement-1.pdf [file NIHMS1548185-supplement-1.pdf]

**Supplementary Table 1.** Demographic information for subjects providing tissue samples.

| Case Number | Age (years) | Gender | Experimental Use | Clinical History                                    |
|-------------|-------------|--------|------------------|-----------------------------------------------------|
| 1           | 41          | F      | IHC, scRNA-seq   | Pituitary adenoma                                   |
| 2           | 52          | M      | IHC, scRNA-seq   | Esthesioneuroblastoma (contralateral, intracranial) |
| 3           | 44          | F      | IHC, scRNA-seq   | Pituitary adenoma                                   |
| 4           | 50          | F      | scRNA-seq        | Pituitary adenoma                                   |
| 5           | 39          | F      | IHC              | Pituitary adenoma                                   |
| 6           | 47          | M      | IHC              | Pituitary adenoma                                   |
| 7           | 23          | F      | IHC              | Pituitary adenoma                                   |

**Supplementary Table 11.** Antibodies used for immunohistochemistry.

| REAGENT                             | SOURCE                       | IDENTIFIER                      | LOT#          | DILUTION |
|-------------------------------------|------------------------------|---------------------------------|---------------|----------|
| Mouse anti-TUJ1                     | BioLegend                    | Cat# 801201; AB_2313773         | B264428       | 1:500    |
| Rat anti-SOX2                       | eBioscience                  | Cat# 14-9811-82;<br>AB_11219471 | 2023691       | 1:50     |
| Rabbit anti-SOX2                    | Cell Signaling<br>Technology | Cat# 3579; AB_2195767           | 01/2014 Lot:5 | 1:50     |
| Rabbit anti-KRT5                    | Abcam                        | Cat# ab52635; AB_869890         | GR3198825-2   | 1:1000   |
| Rabbit anti-LHX2                    | Millipore                    | Cat# ABE1402;<br>AB_2722523     | 3030529       | 1:500    |
| Rabbit anti-GNG13                   | Sigma                        | Cat# HPA046272;<br>AB_10960062  | R42082        | 1:150    |
| Rabbit anti-Ki67                    | Abcam                        | Cat# ab15580; AB_443209         | GR3293897-3   | 1:250    |
| Rabbit anti-<br>Doublecortin        | Cell Signaling<br>Technology | Cat# 4604; AB_561007            | 08/2018 Lot:5 | 1:200    |
| Mouse anti-OMP                      | Santa Cruz<br>Biotechnology  | Cat# sc-365818;<br>AB_10842164  | E1117         | 1:500    |
| Goat anti-OLIG2                     | R&D Systems                  | Cat# AF2418;<br>AB_2157554      | UPA0717121    | 1:500    |
| Mouse anti-TP63                     | Santa Cruz<br>Biotechnology  | Cat# sc-5301; AB_628093         | D2519         | 1:100    |
| AlexaFluor 594<br>Goat anti-Mouse   | Jackson<br>ImmunoResearch    | Cat# 115-585-146;<br>AB_2338881 | 109495        | 1:100    |
| AlexaFluor 488<br>Donkey anti-Mouse | Jackson<br>ImmunoResearch    | Cat# 715-545-150;<br>AB_2340846 | 113699        | 1:100    |
| AlexaFluor 594<br>Goat anti-Rabbit  | Jackson<br>ImmunoResearch    | Cat# 111-585-144;<br>AB_2307325 | 106684        | 1:100    |
| AlexaFluor 488<br>Donkey anti-Rat   | Jackson<br>ImmunoResearch    | Cat# 712-545-150;<br>AB_2340683 | 113383        | 1:100    |
| AlexFluor 488<br>Donkey anti-Goat   | Jackson<br>ImmunoResearch    | Cat# 705-545-147;<br>AB_2336933 | 115940        | 1:100    |
